# Supplementary material
Source: MDPI journal article supplement (https://www.mdpi.com/2311-7524/7/7/200)
Supplement: s1 [file s1]

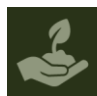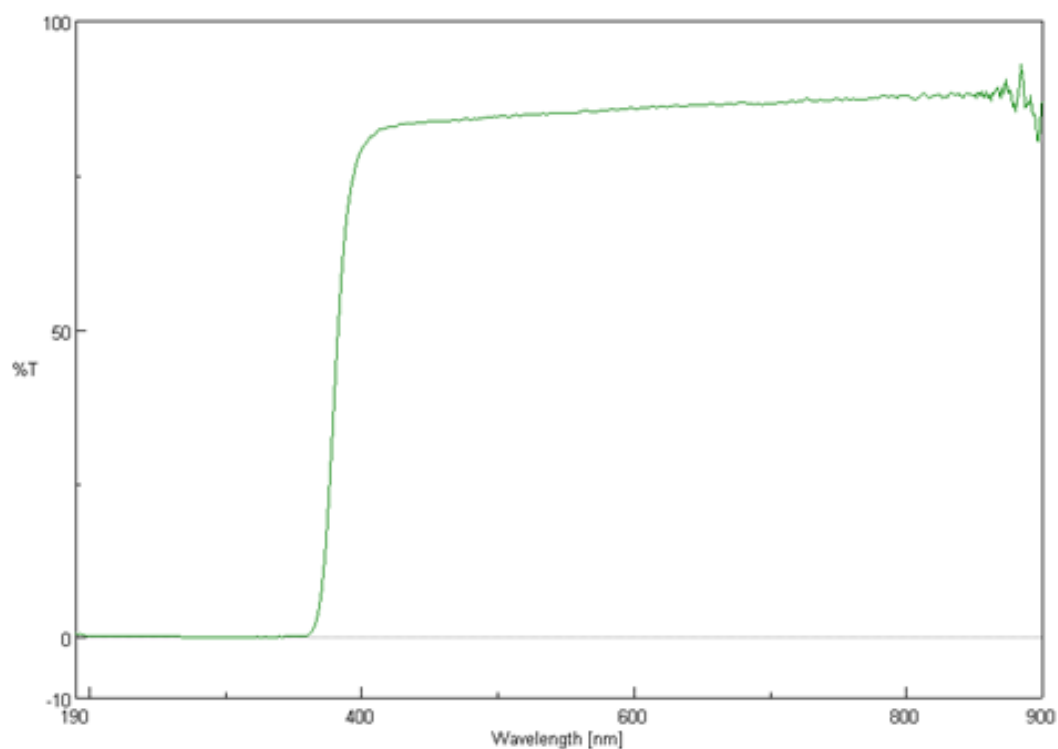

**Figure S1.** UV-Vis transmission as a function of the wavelength of clear plastic film A (Lirsalux by Lirsa).

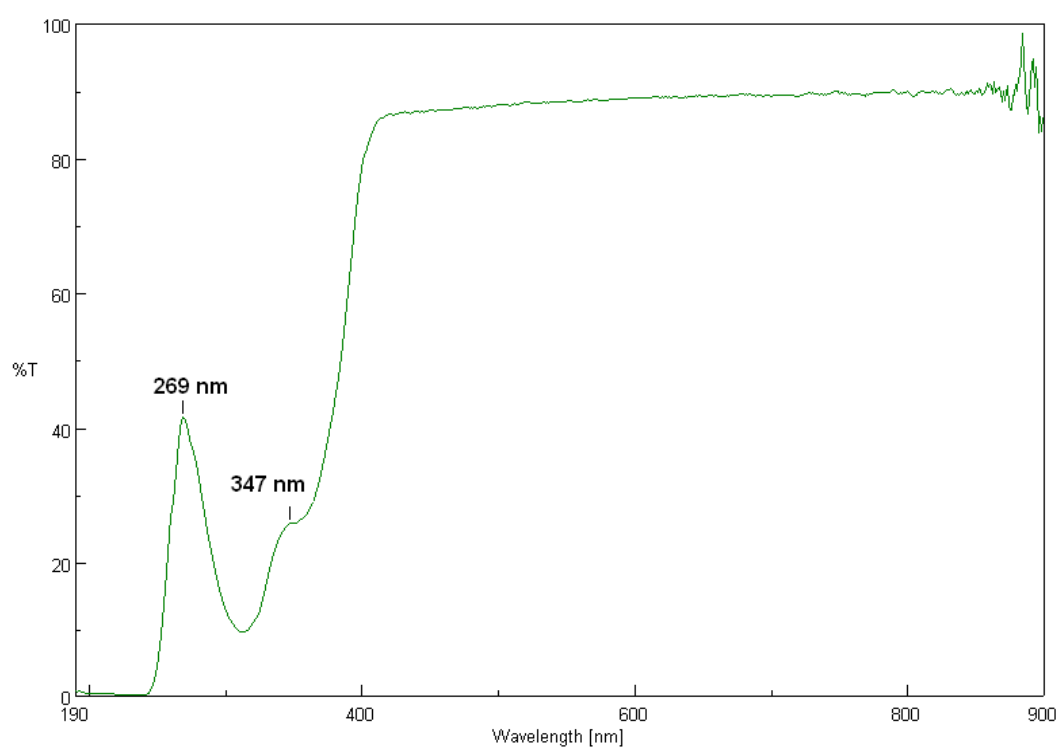

**Figure S2.** UV-Vis transmission as a function of the wavelength of the light diffusion plastic film B (Sunsaver by Ginegar Plastic Products).
